# Supplementary material
Source: PubMed Central journal article supplement (PMC5965092)
Supplement: ofy095_suppl_supplementary_table_1.pdf [file ofy095_suppl_supplementary_table_1.pdf]

|             |      |               |   |   |                     |   |   |   |   |   |                     |   |   |   |                  |
|-------------|------|---------------|---|---|---------------------|---|---|---|---|---|---------------------|---|---|---|------------------|
| 26155       | 4b   | G             | • | • | •                   | • | • | • | • | A | •                   | A | • | A | A                |
| 26168       | 4b   | C             | • | • | •                   | • | • | • | • | • | •                   | T | • | • | •                |
| 26186       | 4b   | C             | • | • | •                   | • | • | • | • | • | •                   | • | • | • | C/G <sup>g</sup> |
| 26339-27064 | 4b,5 | No $\Delta^f$ | • | • | 726nt $\Delta^{f1}$ | • | • | • | • | • | 726nt $\Delta^{f1}$ | • | • | • | •                |
| 27383       | 5    | C             | • | • | C/T <sup>g</sup>    | • | • | • | • | • | •                   | • | • | • | •                |
| 27863       | M    | T             | C | • | •                   | • | C | C | • | C | •                   | C | C | C | C                |
| 28229       | M    | C             | • | • | G                   | • | • | • | • | • | •                   | • | • | • | •                |

**Supplementary Table 1. Genetic differences in Jordan Middle East respiratory syndrome coronavirus (MERS-CoV) outbreak genomes compared with four contemporaneous undeleted genomes from Riyadh, Saudi Arabia.**

<sup>a</sup> Specimen type: nasopharyngeal swab (NPS); bronchoalveolar lavage (BAL); sputum; tracheal aspirate (Aspirate).

<sup>b</sup> Real-time reverse transcription-polymerase chain reaction (rRT-PCR) cycle threshold (Ct) value.

<sup>c</sup> Genome nucleotide position numbering based on MERS-CoV strain Hu/EMC/2012, GenBank accession no. JX869059.2.

<sup>d</sup> Open reading frame.

<sup>e</sup> Reference consensus sequence of Hu/Riyadh-KSA-16121/2015 (KU851860), Hu/Riyadh-KSA-16120/2015 (KU851861), Hu/Riyadh-KSA-16117/2015 (KU851862), Hu/Riyadh-KSA-16098/2015 (KU851864).

<sup>f</sup> Deletion ( $\Delta$ ); superscript numbers indicate genome assignment.

<sup>g</sup> Mixed base at indicated position.
