# Supplementary material
Source: PubMed Central journal article supplement (PMC5965092)
Supplement: ofy095_suppl_supplementary_table_2.pdf [file ofy095_suppl_supplementary_table_2.pdf]

| MERS-CoV Serology Results                                                      | Healthcare Contact |                      |                   | Household Contact |                      |                  |
|--------------------------------------------------------------------------------|--------------------|----------------------|-------------------|-------------------|----------------------|------------------|
|                                                                                | Positive<br>n=3    | Indeterminate<br>n=4 | Negative<br>n=271 | Positive<br>n=2   | Indeterminate<br>n=2 | Negative<br>n=19 |
| Median age (range) -- yr                                                       | 30 (24-49)         | 33 (25-47)           | 29 (20-64)        | 43 and 63         | 4 and 30             | 36 (6-68)        |
| Male sex – no. (%)                                                             | 2 (67)             | 3 (75)               | 179 (66)          | 1 (50)            | 1 (50)               | 12 (63)          |
| <b>Occupation (healthcare contacts only) – no. (%)</b>                         |                    |                      |                   |                   |                      |                  |
| Physician                                                                      | 0                  | 0                    | 29 (11)           | --                | --                   | --               |
| Nurse                                                                          | 1 (33)             | 1 (25)               | 168 (62)          | --                | --                   | --               |
| Nurse's aide                                                                   | 0                  | 0                    | 3 (1)             | --                | --                   | --               |
| Respiratory therapist                                                          | 1 (33)             | 2 (50)               | 11 (4)            | --                | --                   | --               |
| Housekeeping                                                                   | 0                  | 1 (25)               | 30 (11)           | --                | --                   | --               |
| Radiology                                                                      | 1 (33)             | 0                    | 15 (6)            | --                | --                   | --               |
| Admissions or clerical                                                         | 0                  | 0                    | 5 (2)             | --                | --                   | --               |
| Physical or occupational therapist                                             | 0                  | 0                    | 2 (1)             | --                | --                   | --               |
| Other                                                                          | 0                  | 0                    | 8 (3)             | --                | --                   | --               |
| <b>Medical History – no. (%)</b>                                               |                    |                      |                   |                   |                      |                  |
| Diabetes                                                                       | 0                  | 1 (25)               | 8 (3)             | 1 (50)            | 0                    | 7 (37)           |
| Chronic heart disease                                                          | 0                  | 0                    | 4 (1)             | 0                 | 0                    | 1 (5)            |
| Hypertension                                                                   | 0                  | 0                    | 12 (4)            | 1 (50)            | 0                    | 4 (21)           |
| Chronic lung disease                                                           | 0                  | 0                    | 8 (3)             | 0                 | 0                    | 0                |
| Chronic kidney disease                                                         | 0                  | 0                    | 3 (1)             | 0                 | 0                    | 0                |
| Cancer                                                                         | 0                  | 0                    | 1 (<1)            | 0                 | 0                    | 0                |
| Organ transplant                                                               | 0                  | 0                    | 1 (<1)            | 0                 | 0                    | 0                |
| Immunosuppressive medication                                                   | 0                  | 0                    | 2 (1)             | 0                 | 0                    | 0                |
| Pregnant at time of exposure                                                   | 0                  | 1 (25)               | 5 (8)             | 0                 | 0                    | 1 (5)            |
| Smoker                                                                         | 3 (100)            | 3 (75)               | 93 (35)           | 1 (50)            | 1 (50)               | 9 (47)           |
| <b>Febrile or respiratory illness within 14 days of last contact – no. (%)</b> |                    |                      |                   |                   |                      |                  |
| Sought care for illness                                                        | 1 (33)             | 0                    | 37 (14)           | 1 (50)            | 0                    | 1 (5)            |
| <b>Tested for MERS-CoV during outbreak – no. (%)</b>                           |                    |                      |                   |                   |                      |                  |
|                                                                                | 2 (67)             | 0                    | 63 (23)           | 2 (100)           | 2 (100)              | 19 (100)         |

**Supplementary Table 2.** Demographic and clinical characteristics of contacts of confirmed cases included in the seroepidemiologic investigation, by contact type and MERS-CoV serology result.
